# Supplementary material
Source: PubMed Central journal article supplement (PMC3652630)

10 participants  
70 ICs

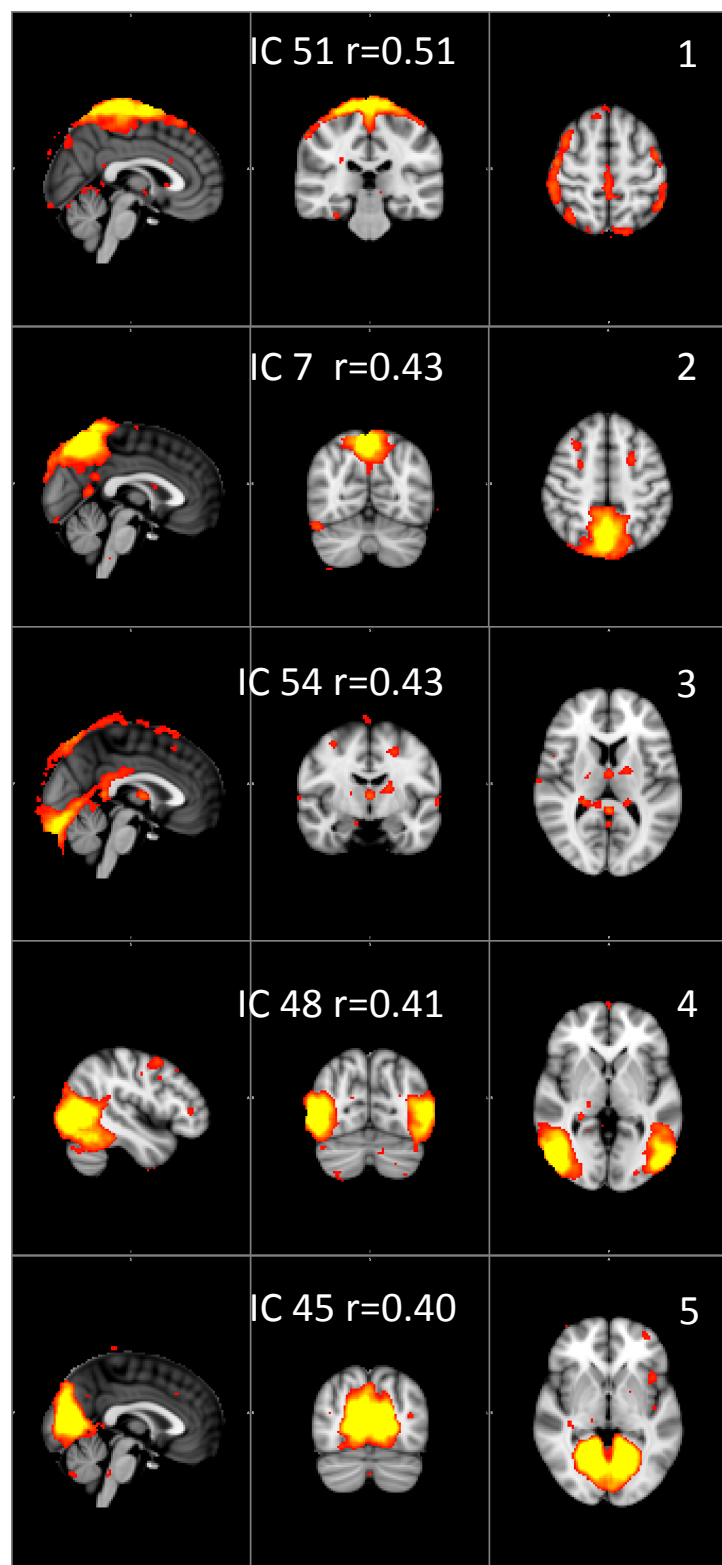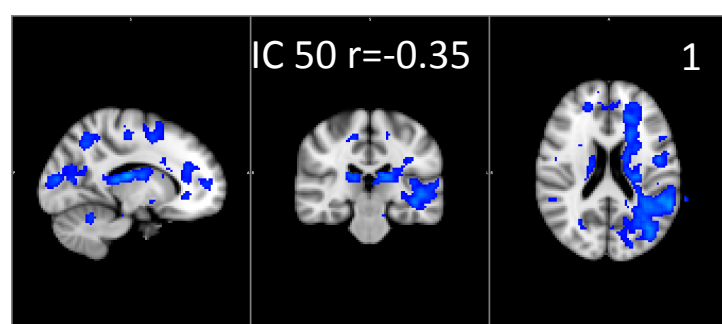

10 participants  
85 ICs

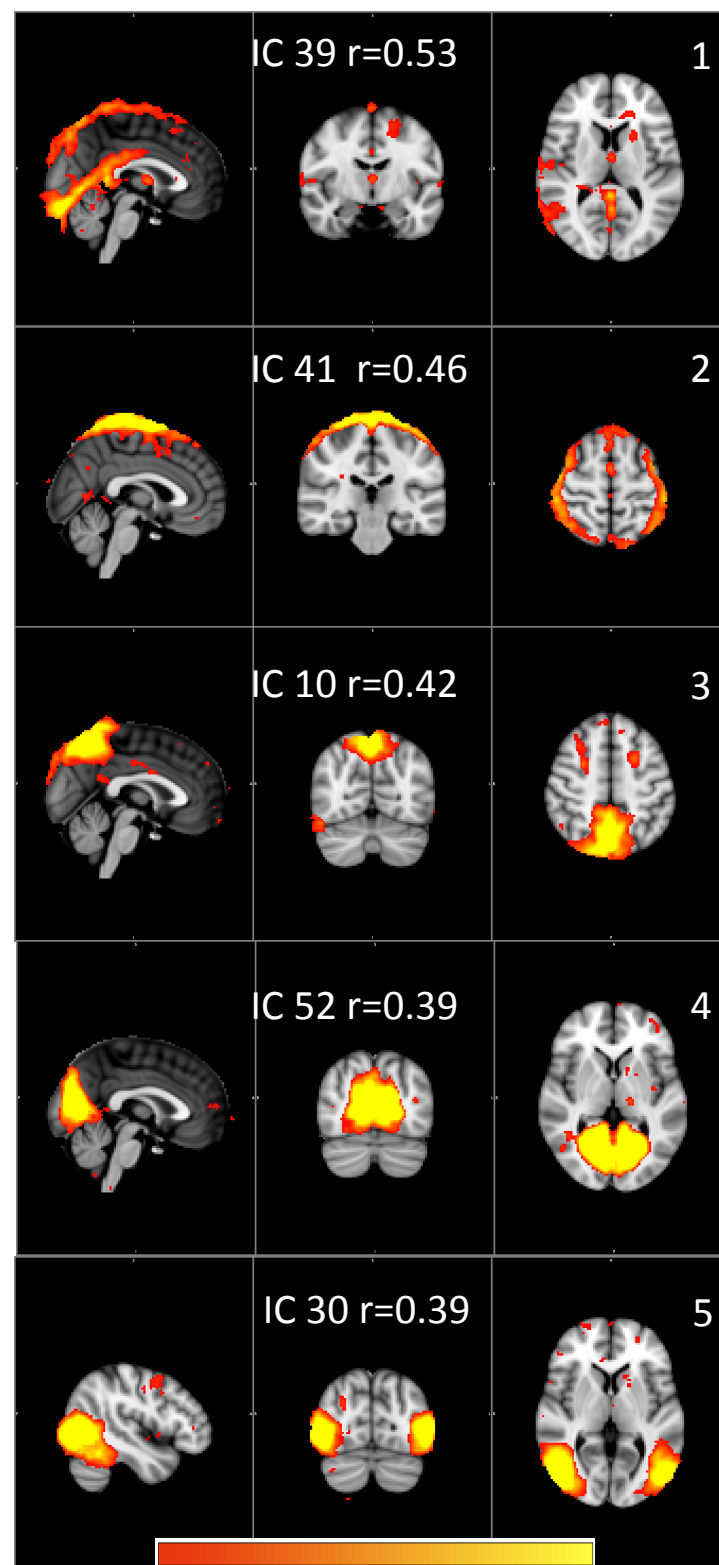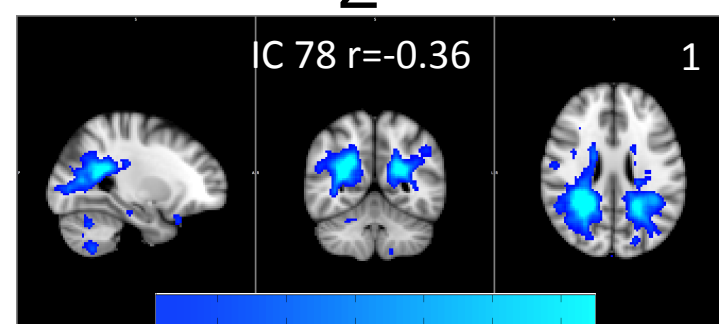

10 participants  
100 ICs

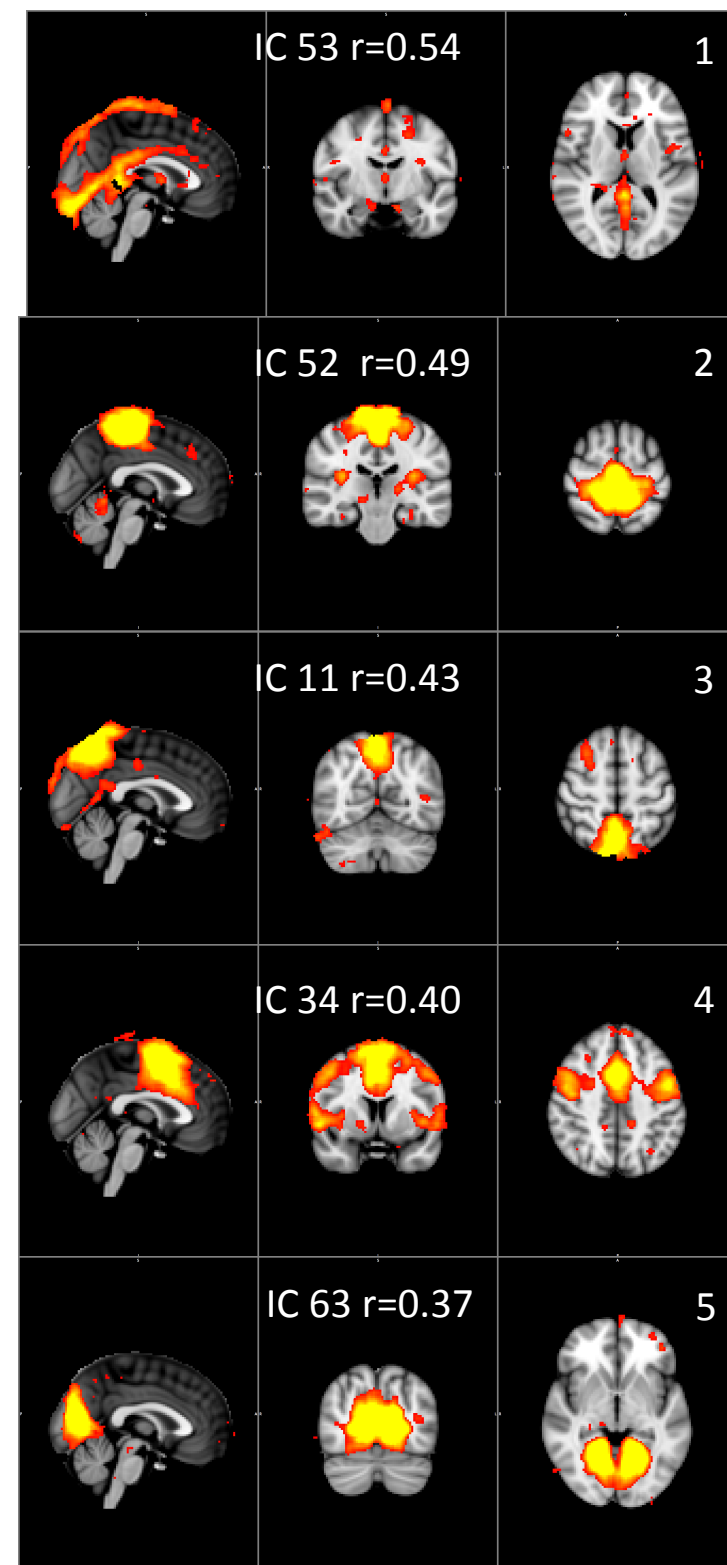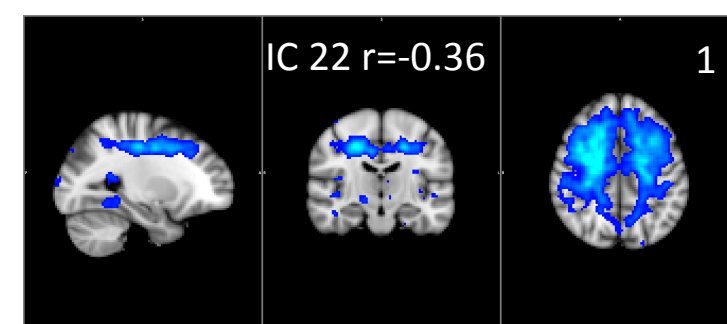

Supplement: NIHMS459808-supplement-01.pdf [file NIHMS459808-supplement-01.pdf]

Number of Participants

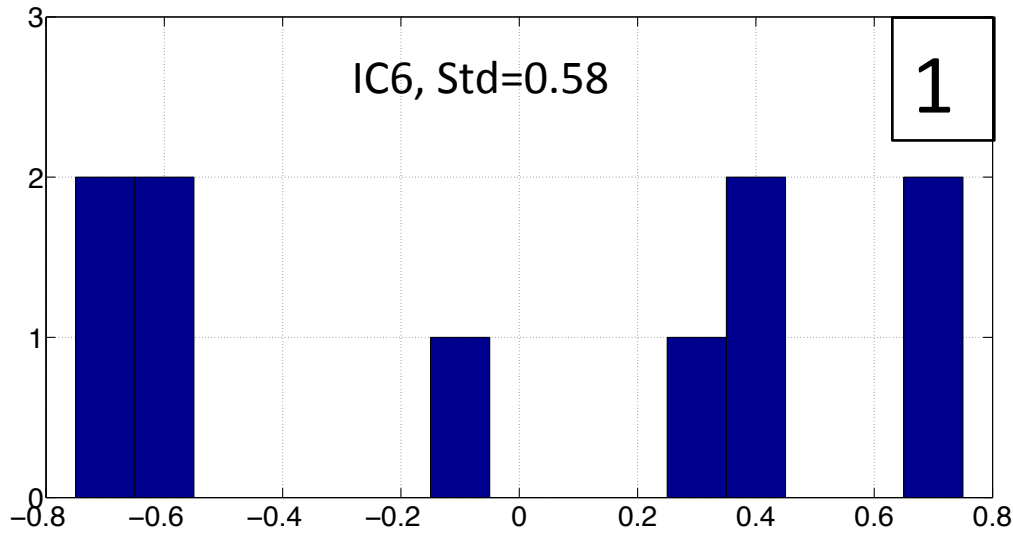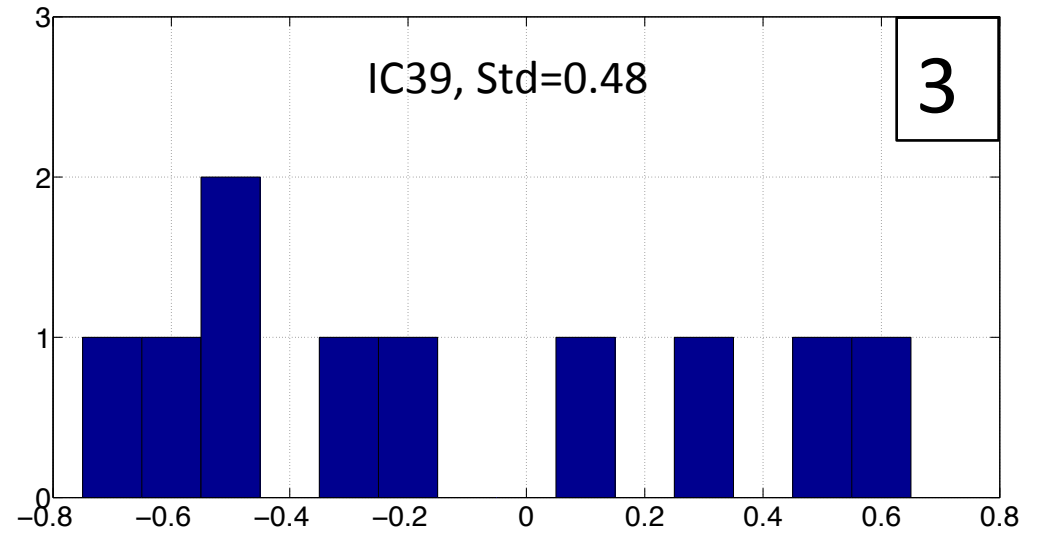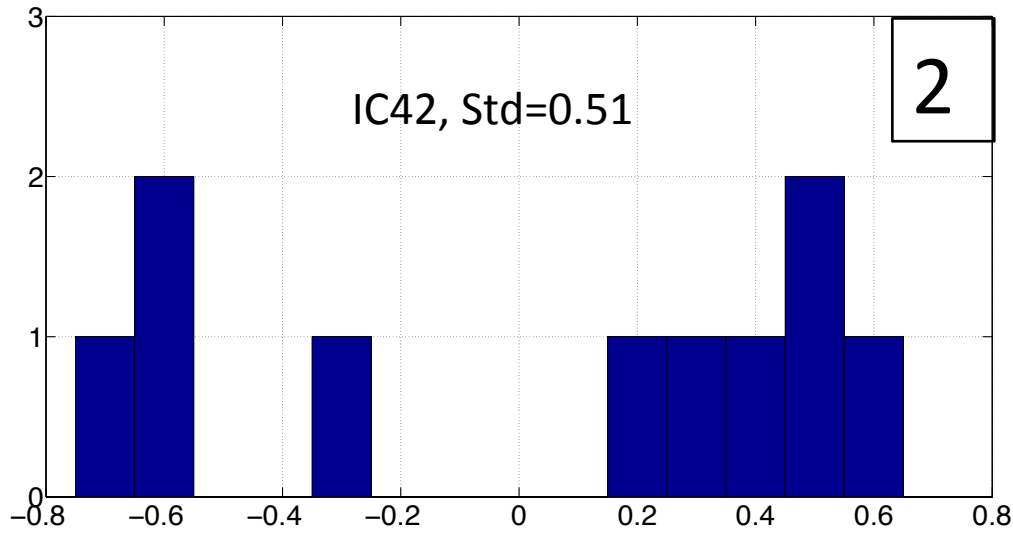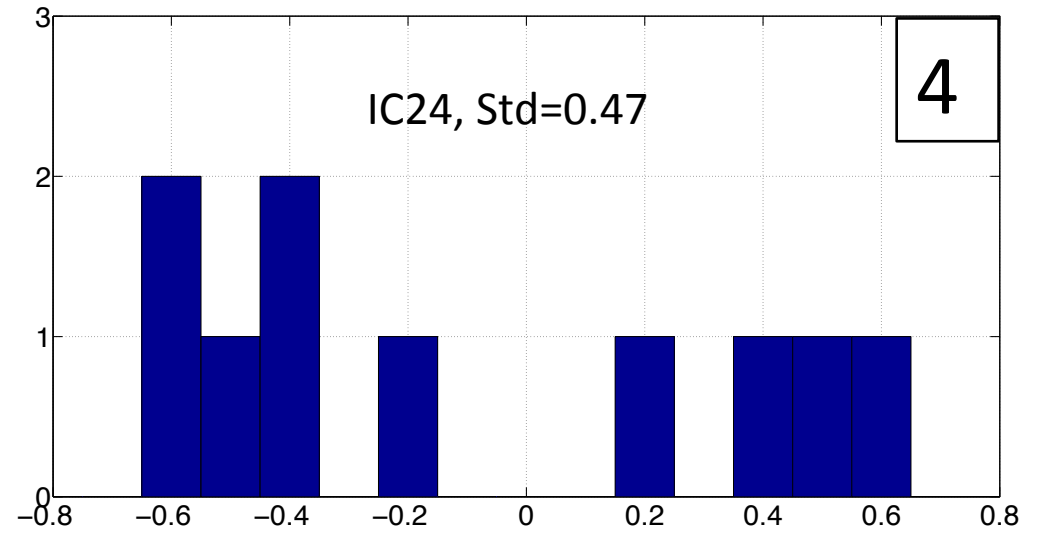

Correlation Coefficient

Supplement: NIHMS459808-supplement-02.pdf [file NIHMS459808-supplement-02.pdf]

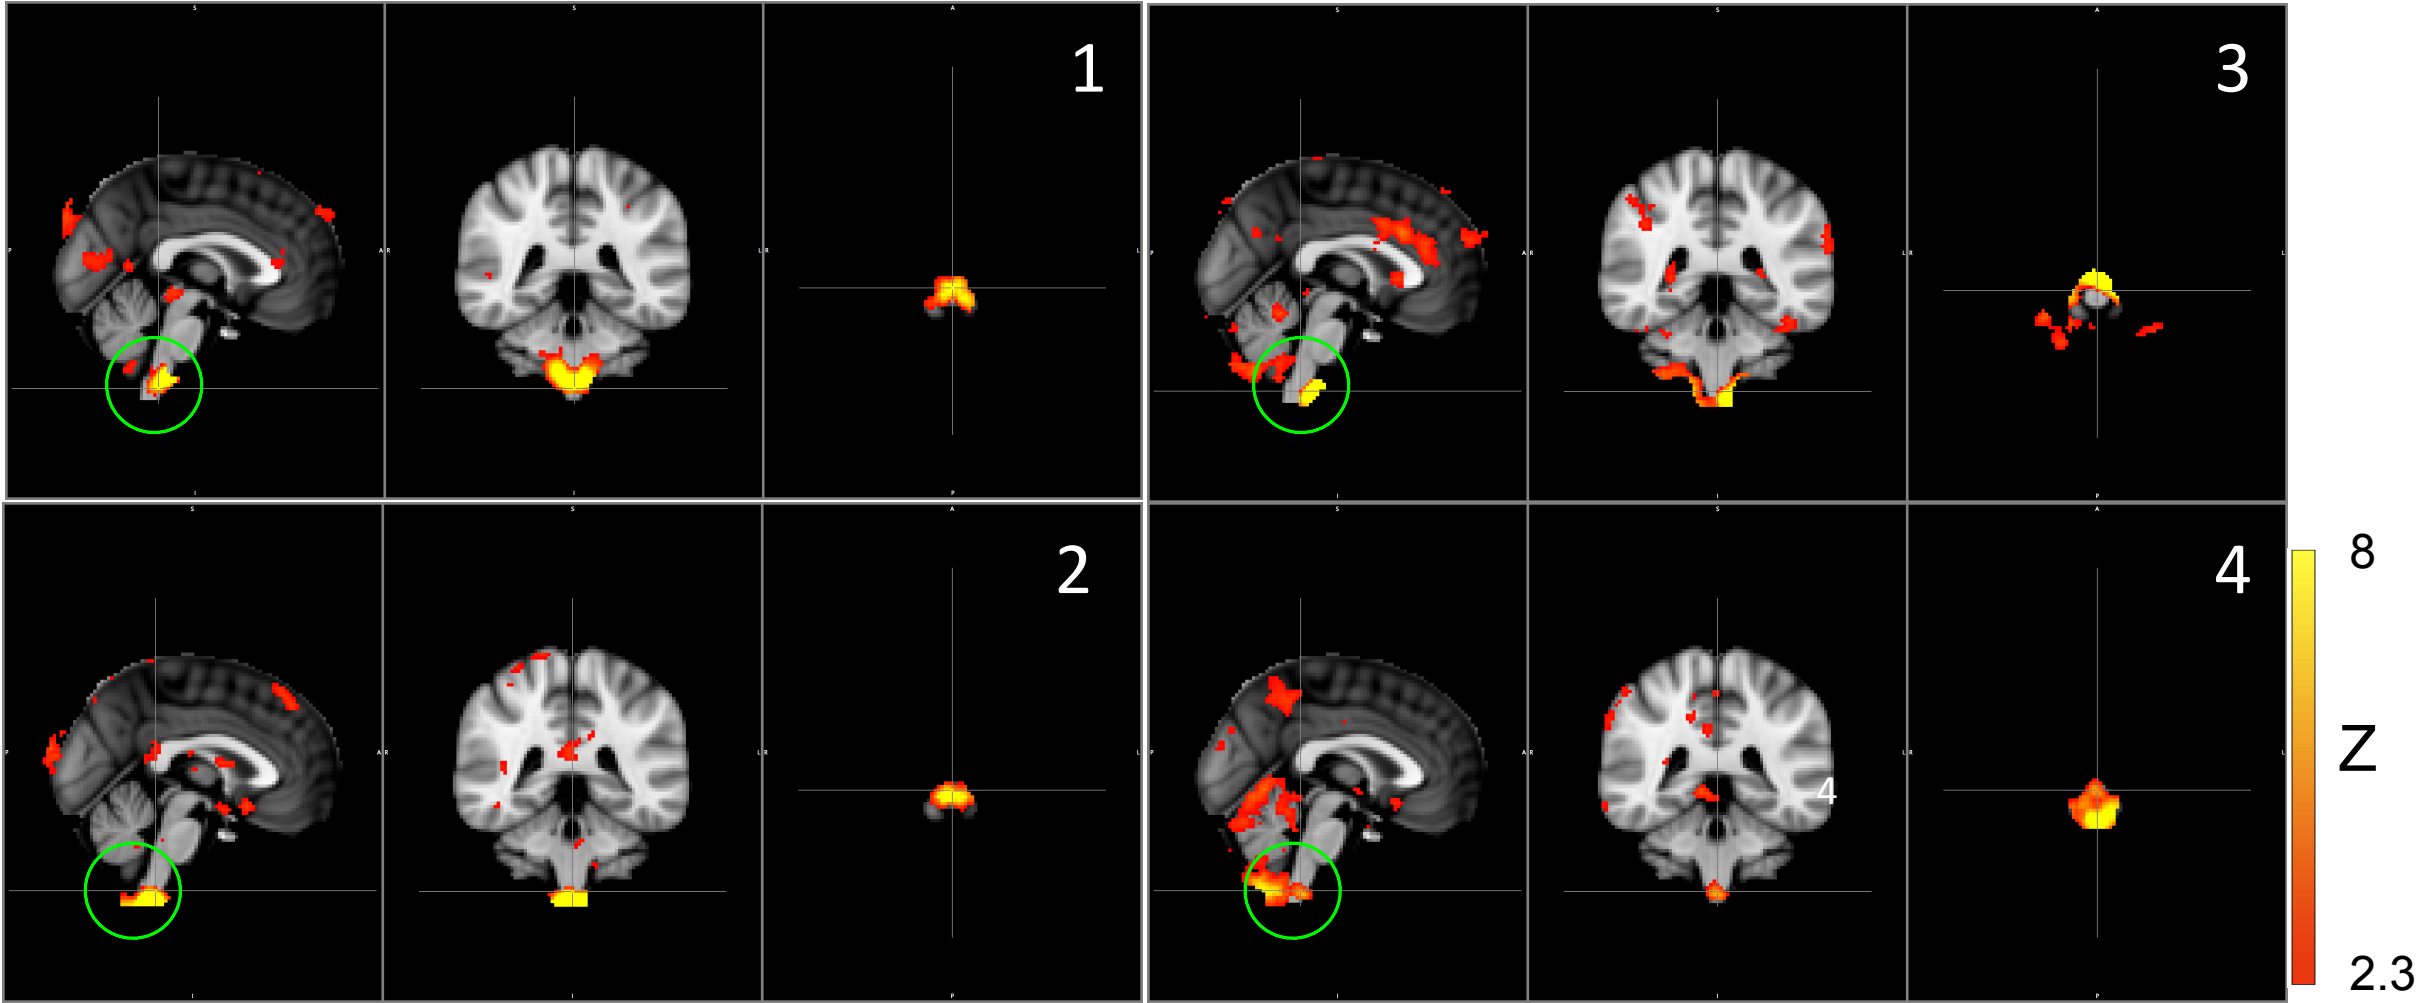

Supplement: NIHMS459808-supplement-03.pdf [file NIHMS459808-supplement-03.pdf]
